# Supplementary material for: Successful dietary changes correlate with weight‐loss outcomes in a new dietary weight‐loss program
Source: PubMed Central journal article supplement — Obes Sci Pract. 2024 May 27;10(3):e764. doi: 10.1002/osp4.764 (PMC11129620; doi:10.1002/osp4.764), 2024-05-27
Supplement: OSP4-10-e764-s001.pdf [file OSP4-10-e764-s001.pdf]

**Supplementary Figure S1.** Shown here is the protein-fiber plot, with protein and fiber measured as g/100 kcal. Green box = desired nutrient range for weight loss; Blue box = desired nutrient range for weight maintenance; Green dot food = high in both protein and fiber; Yellow and red dot foods = lower in both protein and fiber.

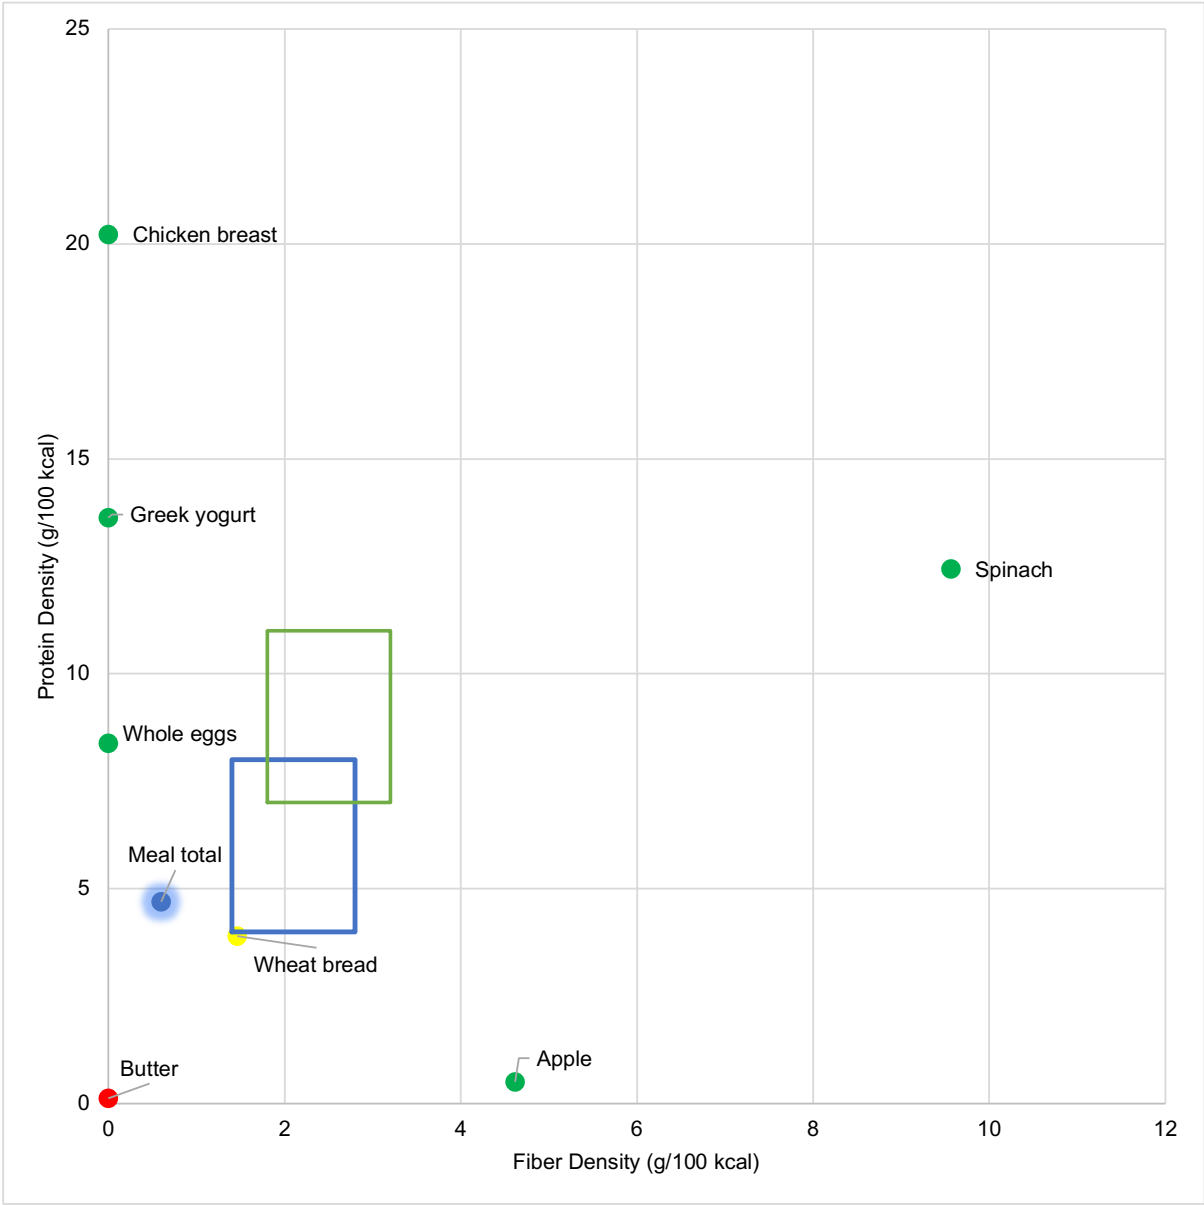

**Supplementary Figure S2.** Shown here is the daily weighing tracking sheet distributed to participants weekly with a comment from their advisor. Green line = 3 month weight loss goal; Blue line = daily weights from Wi-Fi scale; Red line = desired weight loss trendline (1 lb/week, 0.45 kg/week).

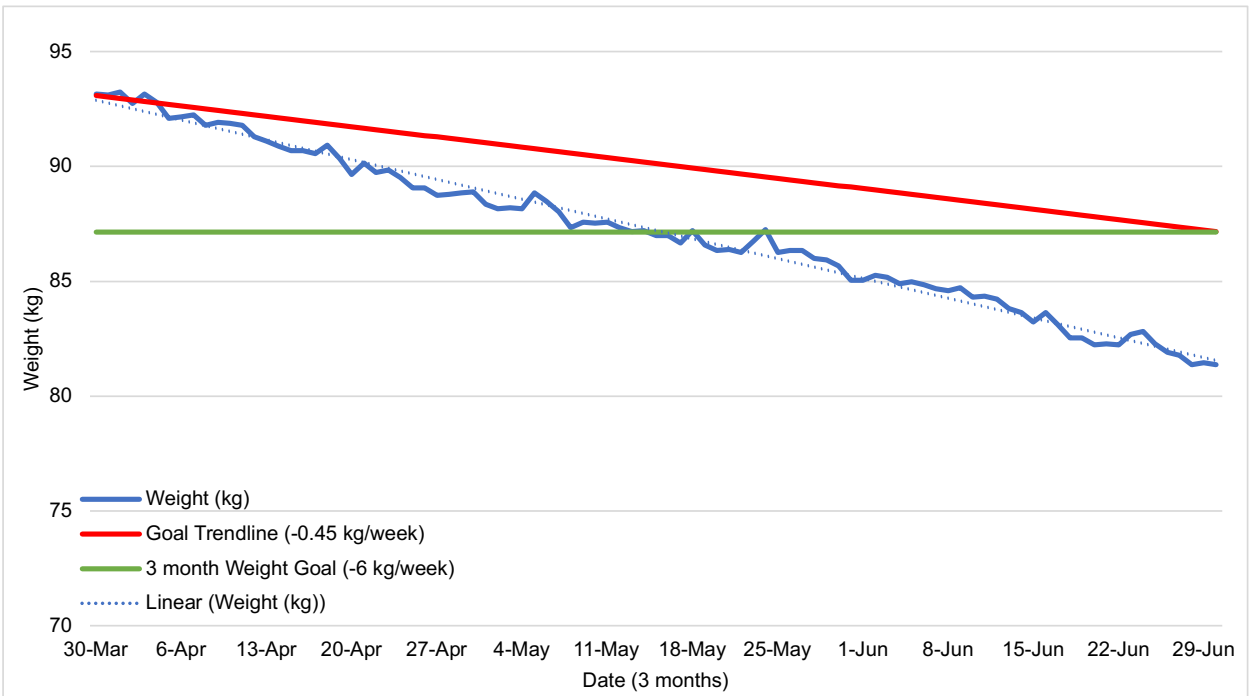

**Supplementary Figure S3.** (A) Correlation between weight change with dietary fiber density at 3 month ( $r = -0.64$ ,  $p = 0.005$ ), (B) 6 months ( $r = -0.61$ ,  $p = 0.01$ ), and (C) 12 months ( $r = -0.64$ ,  $p = 0.005$ ). All ( $n = 17$ ).

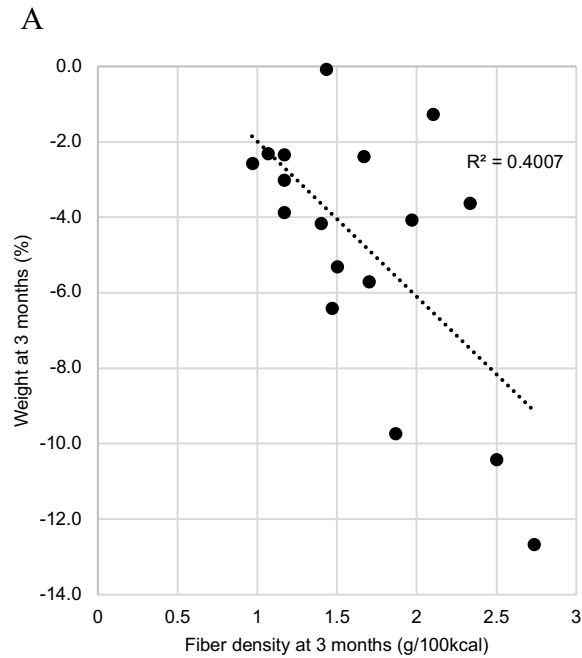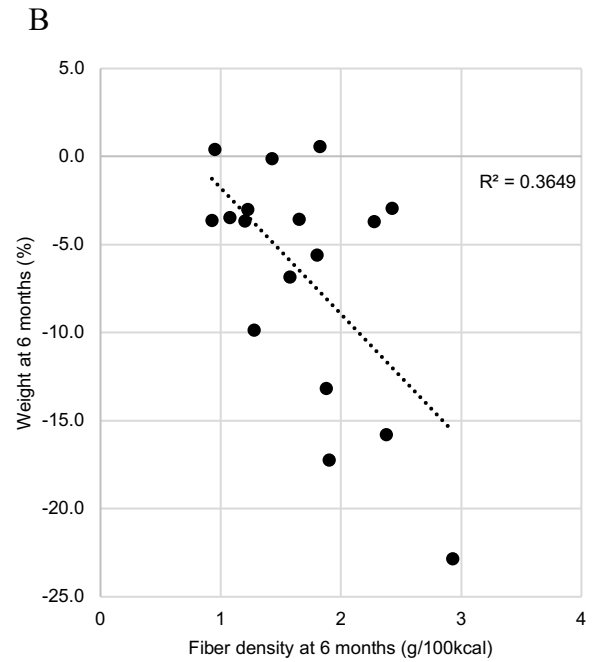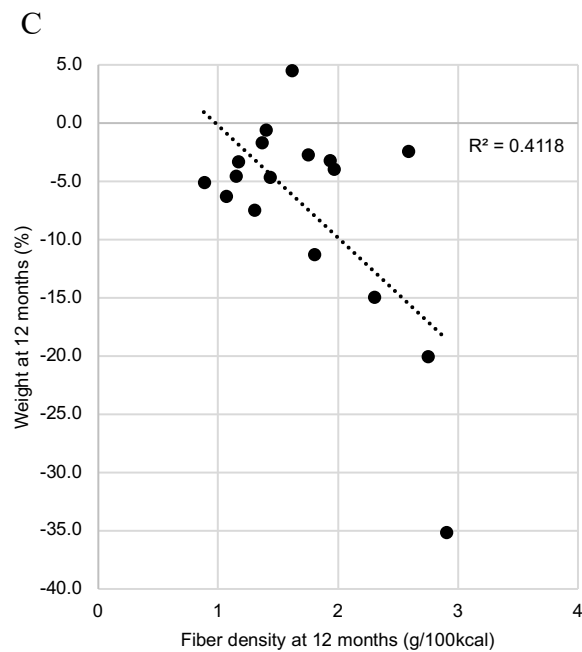

**Supplementary Table S1.** iDip 2 featured 22 sessions and several dietary and body measurements. The timeline of the entire study is shown here.

FFQ = Food Frequency Questionnaire. 24HR = 24-Hour Record.

\*\*Delayed to 15 months due to US 2020 SARS-CoV-2 outbreak.

<sup>a</sup>Performed virtually and asynchronously due to US 2020 SARS-CoV-2 outbreak.

| Week            | Session Title                                            | Dietary Measures | Anthropometrics | Body Composition |
|-----------------|----------------------------------------------------------|------------------|-----------------|------------------|
| <b>Baseline</b> |                                                          | FFQ              | X               | X                |
| <b>1</b>        | Starting Weight Loss                                     |                  |                 |                  |
| <b>2</b>        | Weight Monitoring                                        |                  |                 |                  |
| <b>3</b>        | Establishing Routine                                     |                  |                 |                  |
| <b>4</b>        | 24-Hour Record Completion and Portion Sizes              | 24HR1            |                 |                  |
| <b>6</b>        | Individual Advising 1                                    |                  |                 |                  |
| <b>8</b>        | Importance of Protein 1                                  |                  |                 |                  |
| <b>10</b>       | Importance of Fiber 1                                    | 24HR2            |                 |                  |
| <b>12</b>       | Physical Activity                                        |                  | X               | X                |
| <b>14</b>       | Individual Advising 2                                    |                  |                 |                  |
| <b>16</b>       | Importance of Protein 2                                  |                  |                 |                  |
| <b>18</b>       | Importance of Fiber 2                                    | 24HR3            |                 |                  |
| <b>20</b>       | Trouble Shooting for Slow Weight Loss                    |                  |                 |                  |
| <b>22</b>       | Peer Experience Sharing and Discussion                   |                  |                 |                  |
| <b>24</b>       | Difference Between Weight Loss and Weight Maintenance    | 24HR4            | X               | X                |
| <b>26</b>       | Building a Healthy Plate                                 |                  |                 |                  |
| <b>28</b>       | “Diet” and Replacement Foods                             |                  |                 |                  |
| <b>32</b>       | Barriers to Healthy Eating                               |                  |                 |                  |
| <b>36</b>       | Fats                                                     | 24HR5            |                 |                  |
| <b>39</b>       | Individual Advising 3                                    |                  |                 |                  |
| <b>44</b>       | Salt                                                     | 24HR6            |                 |                  |
| <b>48</b>       | Eat the Rainbow: The Importance of Vitamins and Minerals |                  |                 |                  |
| <b>52</b>       | <sup>a</sup> Exit Session                                | FFQ              |                 |                  |
| <b>60</b>       |                                                          |                  | **              | **               |

**Supplementary Table S2.** Prevalence of self-reported comorbidities and prior dieting experiences.

| <b>Comorbidities</b>               | <b>Prevalence (%)</b>       |
|------------------------------------|-----------------------------|
| Hypercholesterolemia               | 53.3                        |
| Skeletal problems                  | 46.7                        |
| Hypertension                       | 33.3                        |
| Sleep apnea                        | 33.3                        |
| Depression                         | 26.7                        |
| Irregular periods                  | 26.3 of female participants |
| Type 2 Diabetes                    | 23.3                        |
| Asthma                             | 23.3                        |
| Thyroid problems                   | 16.7                        |
| Kidney problems                    | 13.3                        |
| High blood lipids                  | 13.3                        |
| Previous cancer                    | 10                          |
| Muscle pain                        | 6.7                         |
| Non-alcoholic fatty liver disease  | 3.3                         |
| Polycystic ovary syndrome          | 3.3                         |
| <b>Dieting program</b>             | <b>Prevalence (%)</b>       |
| Weight Watchers                    | 43.3                        |
| Low-carbohydrate or ketogenic diet | 30                          |
| Research study weight programs     | 13.3                        |
| South beach diet                   | 10                          |
| Measuring foods                    | 6.7                         |
| Nutrisystem                        | 6.7                         |
| Ideal protein                      | 6.7                         |
| Calorie counting                   | 6.7                         |
| Intermittent fasting               | 6.7                         |
| Daniel Plan                        | 3.3                         |
| Paleo diet                         | 3.3                         |
| 21-day diet                        | 3.3                         |
| Jenny craig                        | 3.3                         |
| Health management resources        | 3.3                         |
| Low-fat diet                       | 3.3                         |
| Salad-based diet                   | 3.3                         |
| No fast foods                      | 3.3                         |
| Low-caloric diet                   | 3.3                         |
| Reduced meat consumption           | 3.3                         |
| Precision Nutrition                | 3.3                         |
| 4-day diet                         | 3.3                         |
| Weight down diet                   | 3.3                         |
| Glycemic index diet                | 3.3                         |
| Trim healthy mama diet             | 3.3                         |
| No sugar diet                      | 3.3                         |
| Protein shakes                     | 3.3                         |
| No dieting experience              | 3.3                         |

**Supplementary Table S3.** Dietary intake at different timepoints. Values are expressed as mean (SD). FFQ = Food Frequency Questionnaire.

|                                   | <b>Timepoints (months)</b> | <b>Protein (g)</b> | <b>Fiber (g)</b> | <b>Calories (kcal)</b> |
|-----------------------------------|----------------------------|--------------------|------------------|------------------------|
| <b>24-Hour<br/>Dietary Record</b> | 1                          | 88.2(25.8)         | 23.1(10.1)       | 1770(519)              |
|                                   | 3                          | 93.9(34.3)         | 24.7(9.7)        | 1498(475)              |
|                                   | 4                          | 85.6(26.5)         | 27.5(10.9)       | 1507(391)              |
|                                   | 6                          | 86.3(26.5)         | 25.4(15.1)       | 1555(511)              |
|                                   | 7                          | 79.1(27.2)         | 26.4(13.1)       | 1448(461)              |
|                                   | 12                         | 76.8(22.2)         | 22.3(9.8)        | 1376(235)              |
| <b>FFQ</b>                        | Baseline                   | 103.1(33.4)        | 25.6(9.2)        | 2206(679)              |
|                                   | Final                      | 91.4(21.4)         | 25.5(9.8)        | 1540(415)              |

**Supplementary Table S4.** Exit survey at 12 months. The 7-point Likert scale used had the following options: 1: Strongly disagree; 2: Disagree; 3: Somewhat disagree; 4: Neutral - I neither agree nor disagree; 5: Somewhat agree; 6: Agree; 7: Strongly agree. n=22.

| Question                                                                                    | Mean score (SD) | Correlation with weight loss (%) at 12 months | Correlation with weight loss (%) at 12 months, p-value |
|---------------------------------------------------------------------------------------------|-----------------|-----------------------------------------------|--------------------------------------------------------|
| <b>Personal Gain</b>                                                                        |                 |                                               |                                                        |
| Do you feel as though you have learned valuable nutrition information?                      | 6.45 (1.5)      | -0.31                                         | 0.16                                                   |
| Was the iDip program effective for achieving your personal goals?                           | 5.32 (1.5)      | -0.53                                         | 0.01*                                                  |
| Did you feel motivated to achieve your goals while in the program?                          | 5.45 (1.5)      | -0.50                                         | 0.02*                                                  |
| Were the skills taught in iDip applicable to your everyday life?                            | 6.18 (1.0)      | -0.45                                         | 0.03*                                                  |
| Do you feel confident in selecting a healthful diet?                                        | 5.95 (1.0)      | -0.45                                         | 0.04*                                                  |
| Was the nutritional content valuable to you?                                                | 6.36 (1.1)      | -0.19                                         | 0.39                                                   |
| <b>Instruction</b>                                                                          |                 |                                               |                                                        |
| Were the instructors knowledgeable?                                                         | 6.77 (0.5)      | 0.00                                          | 0.99                                                   |
| Did the instructors relay the information to you in a manner easily understandable for you? | 6.5 (0.8)       | -0.02                                         | 0.92                                                   |
| Were the face-to-face education sessions useful?                                            | 6.32 (0.9)      | -0.12                                         | 0.59                                                   |
| Were the individual advising sessions useful?                                               | 6.32 (0.8)      | -0.25                                         | 0.26                                                   |
| Were the email and phone communication useful?                                              | 6.27 (0.8)      | -0.25                                         | 0.27                                                   |
| Were the instructors readily available to offer support?                                    | 6.68 (0.6)      | -0.30                                         | 0.18                                                   |
| <b>Education Materials</b>                                                                  |                 |                                               |                                                        |
| Were feedbacks on homework useful?                                                          | 5.36 (1.4)      | -0.15                                         | 0.50                                                   |
| Was the homework after each session useful?                                                 | 4.81 (1.8)      | -0.34                                         | 0.13                                                   |
| Was 24-hour record feedback useful?                                                         | 6.1 (1.2)       | -0.13                                         | 0.57                                                   |
| Was the Protein-Fiber plot useful and easy to understand?                                   | 5.14 (2.1)      | -0.31                                         | 0.15                                                   |
| Was the weight chart useful and easy to understand?                                         | 6.18 (1.4)      | -0.07                                         | 0.74                                                   |
| <b>Engagement</b>                                                                           |                 |                                               |                                                        |
| Was the course engaging for you?                                                            | 6.05 (0.9)      | -0.36                                         | 0.10                                                   |
| Were there enough interactive opportunities for you?                                        | 6.32 (0.8)      | -0.33                                         | 0.13                                                   |
| <b>Overall</b>                                                                              |                 |                                               |                                                        |
| Was this program worth your time?                                                           | 6.32 (1.1)      | -0.22                                         | 0.32                                                   |
| Would you recommend this program to others?                                                 | 6.36 (1.2)      | -0.22                                         | 0.33                                                   |
